# Supplementary material for: Haem relieves hyperoxia-mediated inhibition of HMEC-1 cell proliferation, migration and angiogenesis by inhibiting BACH1 expression
Source: PubMed Central journal article supplement (PMC7905865; doi:10.1186/s12886-021-01866-x), 2021-02-25

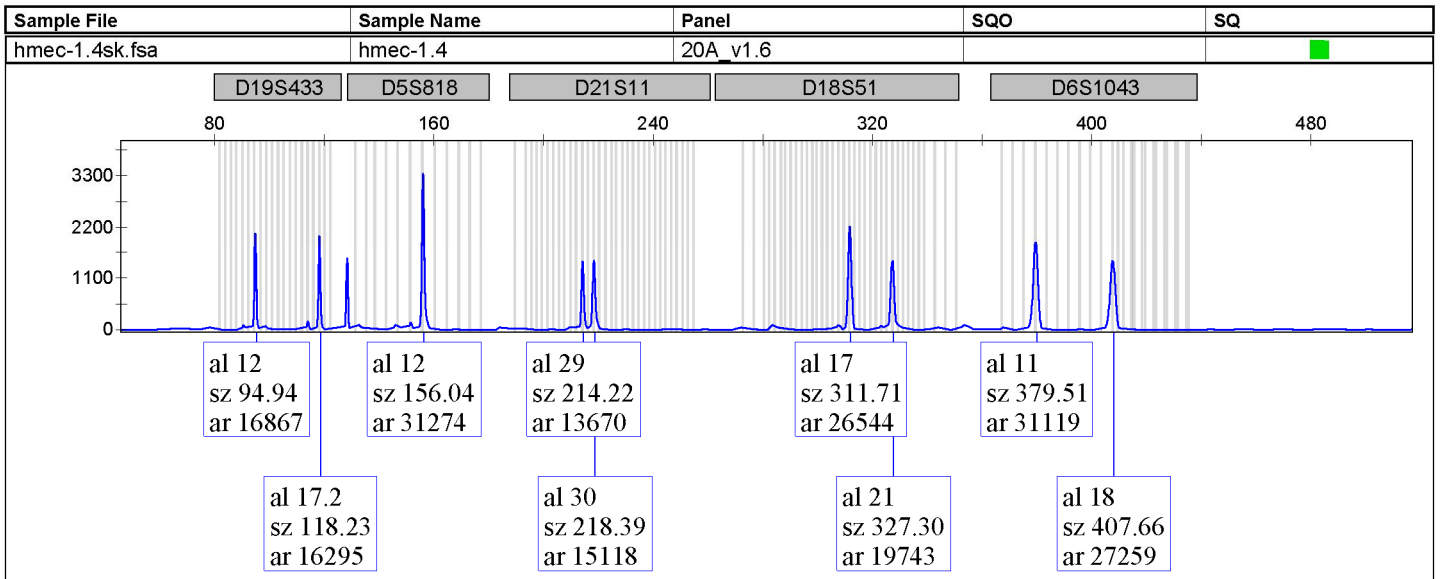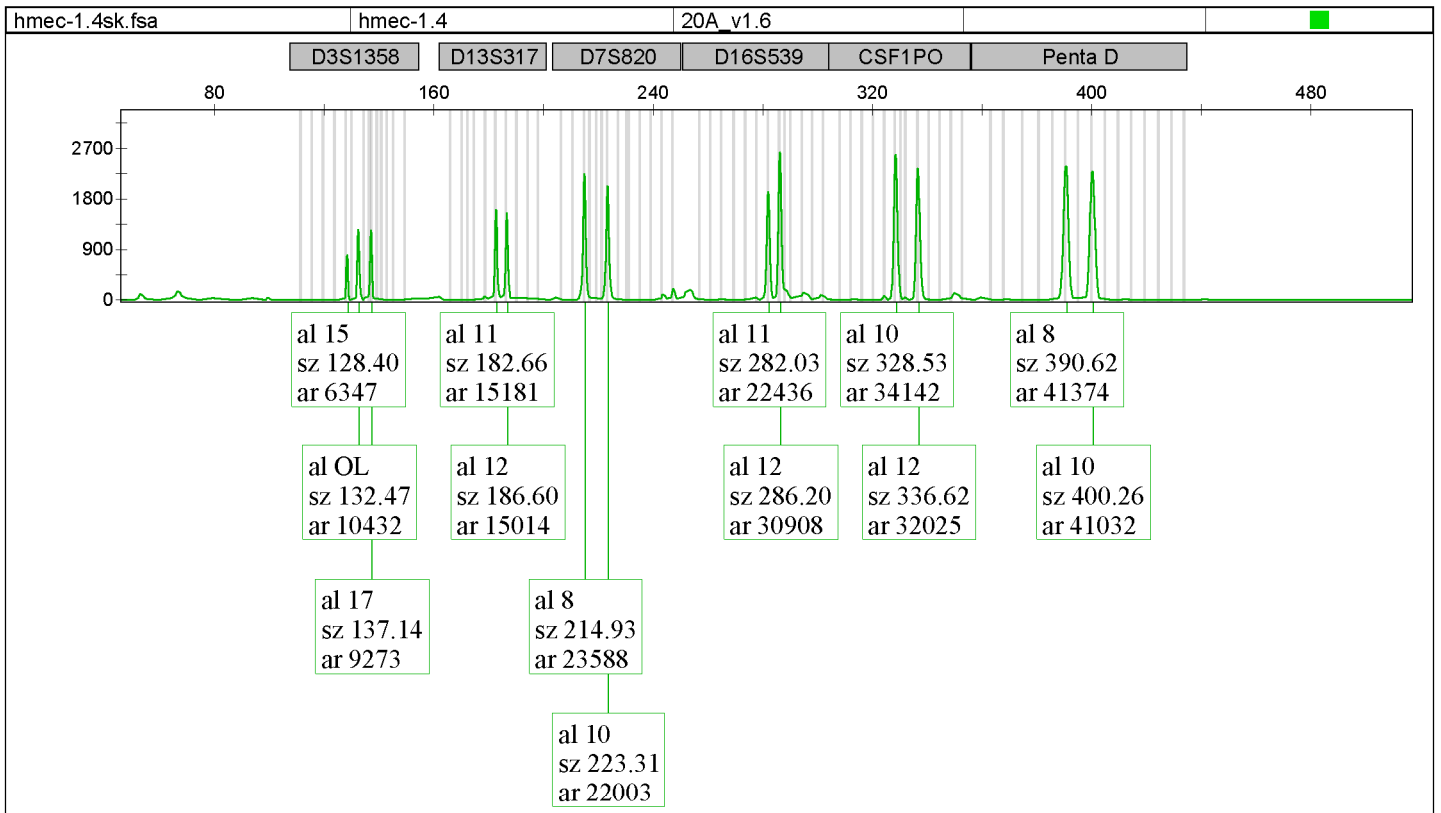

| Sample File    | Sample Name | Panel    | SQO | SQ |
|----------------|-------------|----------|-----|----|
| hmec-1.4sk.fsa | hmec-1.4    | 20A_v1.6 |     | ■  |

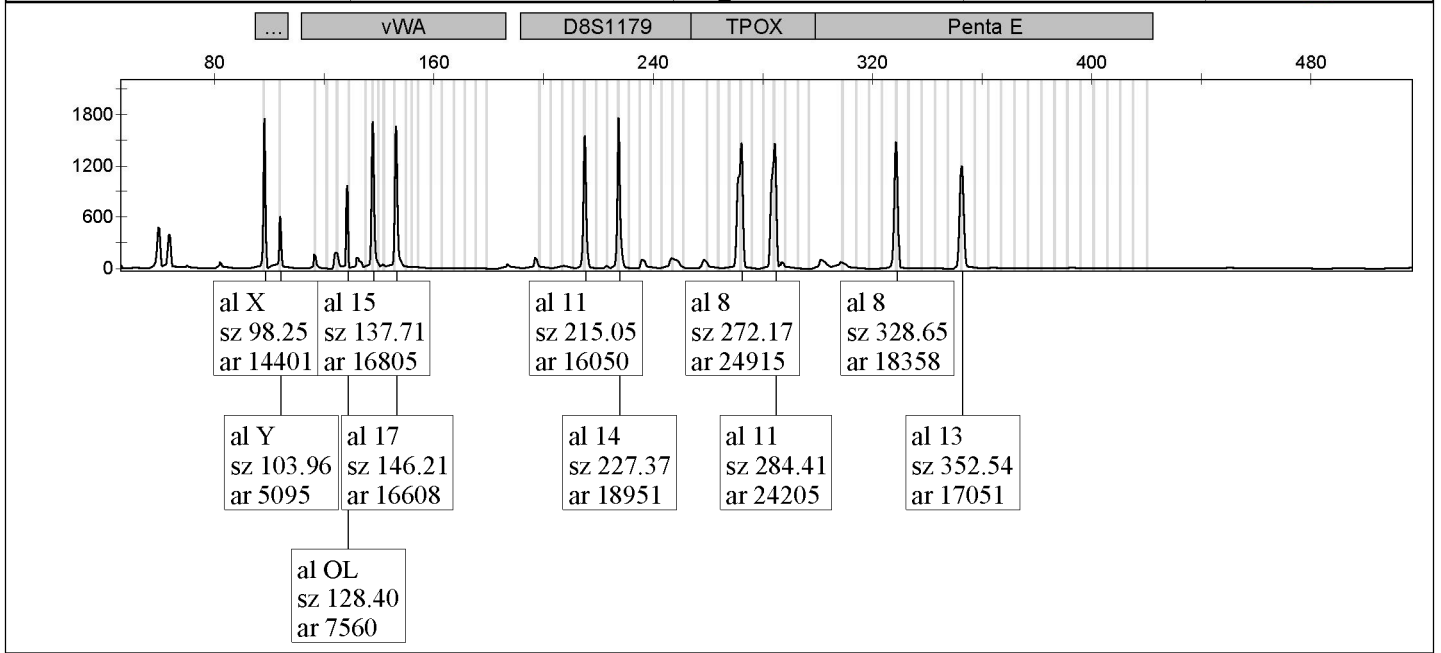

| Sample File    | Sample Name | Panel    | SQO | SQ |
|----------------|-------------|----------|-----|----|
| hmec-1.4sk.fsa | hmec-1.4    | 20A_v1.6 |     | ■  |

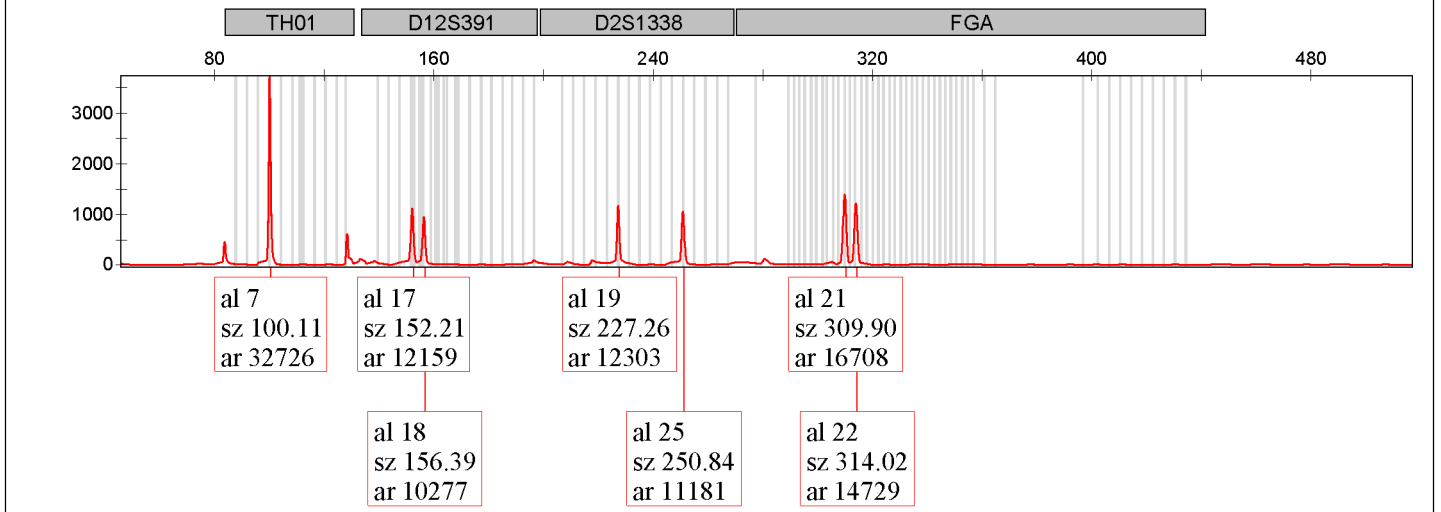

| Sample File    | Sample Name | Panel    | SQO | SQ |
|----------------|-------------|----------|-----|----|
| hmec-1.4sk.fsa | hmec-1.4    | 20A_v1.6 |     | ■  |

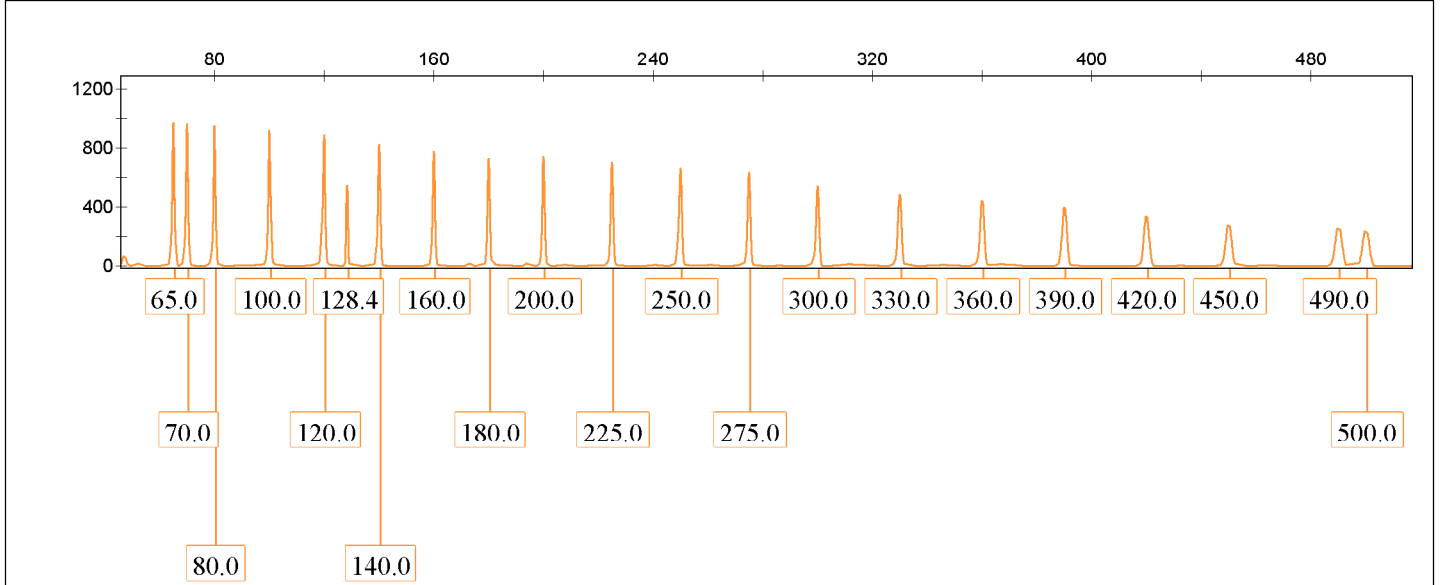

Supplement: 12886_2021_1866_MOESM2_ESM.pdf [file 12886_2021_1866_MOESM2_ESM.pdf]
